# Supplementary material
Source: PubMed Central journal article supplement (PMC6709477)
Supplement: AAC.00461-19-s0001.pdf [file AAC.00461-19-s0001.pdf]

## Supplemental Data

### Rapid Identification of New Delhi Metallo- $\beta$ -Lactamase (NDM)

#### Using Tryptic Peptides and LC-MS/MS

Honghui Wang<sup>a</sup>, Jeffrey R. Strich<sup>a</sup>, Steven K. Drake<sup>a</sup>, Yong Chen<sup>b</sup>, Jung-Ho Youn<sup>c</sup>, Avi Z. Rosenberg<sup>d,e</sup>,

Marjan Gucek<sup>b</sup>, John P. Dekker<sup>c,f,†</sup>, Anthony F. Suffredini<sup>a,†</sup>

<sup>†</sup>These authors contributed equally

<sup>a</sup>Critical Care Medicine Department, Clinical Center, National Institutes of Health, Bethesda, Maryland, USA; <sup>b</sup>Proteomics Core Facility, National Heart, Lung and Blood Institute, National Institutes of Health, Bethesda, Maryland, USA; <sup>c</sup>Department of Laboratory Medicine, Clinical Center, Microbiology Service, National Institutes of Health, Bethesda, Maryland, USA; <sup>d</sup>Kidney Disease Section, National Institute of Diabetes and Digestive and Kidney Diseases, National Institutes of Health, Bethesda, Maryland, USA; <sup>e</sup>Department of Pathology, Johns Hopkins University Baltimore, Maryland, USA; <sup>f</sup>Laboratory of Clinical Immunology and Microbiology, National Institute of Allergy and Infectious Diseases, National Institutes of Health, Bethesda, Maryland, USA.

### **MRM assay for mutated form of SLGNLGDADTEHYAASAR**

Labeled peptides SLGNL**D**DADTEHYAASAR for NDM-12, SLGNLGDADTEHYAAS**V**R for NDM-6, and NDM-15 containing heavy isotopic labels in R (U-13C6; U-15N4) or K (U-13C6; U-15N2) C-terminus amino acids were purchased (JPT, Berlin, Germany). Bolded letters **D** and **V** indicate mutations of G6D and A17V. The peptides and transitions for all three peptides are listed below. The collision energy for all transitions was set to 23 eV. The MRM assay was run separately on an Agilent CubeChip 6495 QQQ with a high capacity chip as described in the main text for sample L063.

| Peptide                     | Charge | Precursor | T1    | T2    | T3    | T4    | T5    | T6    |
|-----------------------------|--------|-----------|-------|-------|-------|-------|-------|-------|
| SLGNLGDADTEHYAASAR          | 3+     | 616.6221  | Y6+   | Y16++ | Y14++ | Y13++ | Y12++ | Y11++ |
| SLGNL <b>D</b> DADTEHYAASAR | 3+     | 635.9573  | Y16++ | Y14++ | Y13++ | Y12++ | Y11++ |       |
| SLGNLGDADTEHYAAS <b>V</b> R | 3+     | 625.9659  | Y16++ | Y14++ | Y13++ | Y12++ | Y11++ |       |

### **Total proteomics for two preparations of samples L092 and L099**

In the 100-sample assay validation experiment, no NDM protein was detected in sample numbers L092 and L099. However, triplicate testing of protein extractions from repeat cultures of these two isolates revealed highly expressed NDM protein. To rule out the possibility of plasmid loss or sample mishandling, we used a total proteomics approach to investigate the plasmid proteins in two preparations of these two samples that had initially demonstrated no NDM peptides.

1 µg of the leftover digests used for MRM was injected to Orbitrap Lumos LC-MS/MS for total proteomics with 2 hr gradient using the same protocol described in the main text for protein identification. To search for plasmid proteins, LC-MS/MS data for two preparations of sample L092 were searched against the protein database of CDC\_0118 (the corresponding genomic sequence for L092), which has 5346 proteins including 394 plasmid proteins (downloaded from NCBI on 10/2018). LC-MS/MS data for two sample preparations of L099 were searched against the protein database of CDC\_0128 (the corresponding genomic sequence for L099), which has 5165 proteins including 395 plasmid proteins (downloaded from NCBI on 10/2018). Label-free quantification was analyzed by Proteome Discoverer 2.2 (Thermal Scientific) to compare the plasmid protein expression of the two preparations of sample L092 and the two preparations of sample L099 respectively.

A total of 1349 to 1562 (including 30-48 plasmid proteins for each sample) high confidence proteins (FDR < 0.1) with minimum of 2 unique peptides were detected for these 4 samples. CDC\_0118 (L092) contains three probable plasmid contigs: plasmid unitig\_1 (encoding 165 proteins), plasmid unitig\_2 (encoding 214 proteins) and plasmid unitig\_3 (encoding 105 proteins). CDC\_0128 (L099) also contains three probable plasmid contigs: plasmid tig00000792 (encoding 156 proteins), plasmid tig00000793 (encoding 222 proteins) and plasmid tig00000856 (encoding 7 proteins) with 156, 222 and 7. In L092,

the *bla<sub>NDM</sub>* gene is located on plasmid unitig\_1. A total of 22 high confidence proteins encoded by plasmid unitig\_1 were detected in the first preparation of sample L092 and 20 were detected in the repeated sample preparation of sample L092, indicating that this presumptive plasmid was not lost, even though NDM was not detected in the first preparation of the sample L092.

A similar result was found for the two preparations of the sample L099. The *bla<sub>NDM</sub>* gene is located on presumptive plasmid tig00000793. A total of 12 high confidence plasmid proteins encoded by tig00000793 were detected in the first preparation of L099, and 16 proteins from this contig were detected in the repeat preparation of the sample L099, indicating that this presumptive plasmid was not lost, even though NDM protein was not detected. The results are summarized in the supplemental Table 5a and 5b.

**Targeted LC-MS/MS:** Targeted LC-MS/MS was performed on Orbitrap Fusion Tribrid mass spectrometer-based (Thermo Fisher Scientific) nano LC-MS system. Briefly, 6  $\mu$ L of 5 fm/ $\mu$ L labeled peptide mix was added to 24  $\mu$ L of 0.1  $\mu$ g/ $\mu$ L tryptic digests and 10  $\mu$ L of the resulting mixture was injected into the mass spectrometer and separated on an EasySpray column (Thermo Fisher ES803, 50 cm x 75  $\mu$ m ID packed with PepMap RSLC C18 2  $\mu$ m particles) using a 40-min linear gradient of 5-35% ACN in 0.1% FA at a flow rate of 300 nL/min. Mass analysis was carried out in Targeted MS2 (tMS2) mode. Selected precursors and their corresponding labeled peptides were isolated at 0.8 m/z window and fragmented in HCD cell with previously optimized energy which was 28, 28 and 24 eV for SLGNLGDADTEHYAASAR, ASMIVMSHSAPDSR and AFGAAFPk respectively. Resulting fragment ions were detected in the Orbitrap cell at 30K resolution. The maximum acquisition time and gain for each targeted MS/MS spectrum was 120 ms and  $2 \times 10^5$  respectively. Skyline 4.2 software package (MacCross lab) was used for quantitative and relative spectral intensity comparisons. The same tryptic peptide digests and labeled peptides used in MRM validation were used in this tMS2 experiment.

Supplemental Figure 4 shows the comparison of LC-MS/MS chromatograms of five samples on three NDM peptide markers by targeted LC-MS/MS using a high mass resolution mass spectrometer (Orbitrap Lumos) and MRM assay using Agilent 6495 Chip Cube QQQ. Five samples were selected for this experiment: L017, L021 (as negative control), L024 (as positive control), L017 L075 and L100. L017 had very low NDM expression and the Chip Cube QQQ MRM assay failed to detect NDM peptide markers in this sample. L075 and L100 had low NDM abundance and were the only two samples whose spectra were manually identified as NDM-positive. L024 had medium NDM abundance. The use of the high resolution Orbitrap Lumos mass spectrometer and longer gradient reduced interference and improved the detection of the isolates with low NDM abundance, especially for AFGAAFPk. The gradient used in the Orbitrap Lumos was 40 min which is much longer than 10 min used in MRM. For L017, two NDM peptide markers, SLGNLGDADTEHYAASAR and AFGAAFPk, were detected by Orbitrap Lumos while ASMIVMSHSAPDSR was not detected. No interference was observed for AFGAAFPk. The MS/MS spectra for AFGAAFPk in L017 were clear and decisively positive. The R-ratio for L017, L100, L075 and L024 was 0.01, 0.08, 0.27 and 3.64 respectively for AFGAAFPk, which correctly correlated to the NDM abundance levels determined by MRM assay. Thus, AFGAAFPk could be the best peptide marker for the NDM protein using the high resolution mass spectrometer and longer gradient. Interferences were still observed for SLGNLGDADTEHYAASAR in sample L100. However, its MS/MS spectra acquired by the Orbitrap Lumos contained the full set of transitions. After removing the  $y_8^+$ ,  $y_8^{++}$ ,  $y_9^+$ , and  $y_8^{++}$  transitions, the remaining transitions of the native peptide in L100 matched well with those in the labeled peptide, indicating positive peptide identification. The LC-MS chromatogram shown in Supplemental Figure 4 for this peptide in L100 is displayed with  $y_8^+$ ,  $y_8^{++}$ ,  $y_9^+$  and  $y_9^{++}$  transitions

removed. Acquisition of the full set of transitions is one of the advantages of the high resolution mass spectrometer.

### **References**

1. Fusaro VA, Mani DR, Mesirov JP, Carr SA. 2009. Prediction of high-responding peptides for targeted protein assays by mass spectrometry. *Nat Biotechnol* 27:190-8.

**Supplemental Table 1:** *bla*<sub>NDM</sub>-containing and negative control isolates used in assay development and

| Name                                              | Protein ID                           | Assay development |                                      | Validation       |                                      |
|---------------------------------------------------|--------------------------------------|-------------------|--------------------------------------|------------------|--------------------------------------|
|                                                   | <i>bla</i> <sub>NDM</sub> containing | Negative control  | <i>bla</i> <sub>NDM</sub> containing | Negative control | <i>bla</i> <sub>NDM</sub> containing |
| <i>Achromobacter</i> sp.                          |                                      | 1                 |                                      | 2                |                                      |
| <i>Acinetobacter baumannii</i>                    |                                      |                   | 1                                    |                  | 1                                    |
| <i>Acinetobacter ursingii</i>                     |                                      |                   |                                      | 1                |                                      |
| <i>Aeromonas</i> sp.                              |                                      |                   |                                      | 1                |                                      |
| <i>Citrobacter freundii</i> complex               |                                      | 1                 |                                      | 4                |                                      |
| <i>Citrobacter koseri</i>                         |                                      | 1                 |                                      | 1                |                                      |
| <i>Citrobacter</i> sp.                            |                                      |                   |                                      |                  | 1                                    |
| <i>Chryseobacterium</i> sp.                       |                                      |                   |                                      | 1                |                                      |
| <i>Enterobacter cloacae</i> complex               |                                      | 1                 |                                      | 8                | 1                                    |
| <i>Escherichia coli</i>                           |                                      | 2                 | 1                                    | 21               | 9                                    |
| <i>Enterococcus faecalis</i>                      |                                      |                   |                                      | 1                |                                      |
| <i>Klebsiella oxytoca</i>                         |                                      | 2                 |                                      | 2                |                                      |
| <i>Klebsiella oxytoca/Raoutella ornitholytica</i> |                                      |                   |                                      | 1                |                                      |
| <i>Klebsiella pneumoniae</i>                      | 1                                    | 2                 | 2                                    | 11               | 8                                    |
| <i>Morganella morganii</i>                        |                                      |                   |                                      | 1                | 1                                    |
| <i>Pseudomonas aeruginosa</i>                     |                                      | 4                 |                                      | 8                |                                      |
| <i>Proteus mirabilis</i>                          |                                      |                   |                                      | 1                | 1                                    |
| <i>Providencia rettgeri</i>                       |                                      |                   |                                      |                  | 1                                    |
| <i>Pantoea</i> sp.                                |                                      | 1                 |                                      |                  |                                      |
| <i>Rhizobium radiobacter</i>                      |                                      |                   |                                      | 2                |                                      |
| <i>Salmonella Senftenberg</i>                     |                                      |                   |                                      |                  | 1                                    |
| <i>Stenotrophomonas maltophilia</i>               |                                      | 1                 |                                      | 4                |                                      |
| <i>Serratia liquifaciens</i>                      |                                      |                   |                                      | 1                |                                      |
| <i>Serratia marcescens</i>                        |                                      |                   |                                      | 2                |                                      |
| <i>Sphingomonas</i> sp.                           |                                      |                   |                                      | 1                |                                      |
| <i>Staphylococcus epidermidis</i>                 |                                      |                   |                                      | 1                |                                      |
| <i>Staphylococcus haemolyticus</i>                |                                      |                   |                                      | 1                |                                      |
| <b>Total</b>                                      | <b>1</b>                             | <b>16</b>         | <b>4</b>                             | <b>76</b>        | <b>24</b>                            |

**Supplemental Table 2:** Tryptic peptides for 15 NDM variants and ESP values per ESPPredictor

| <i>in silico</i> digested tryptic peptide | n variants | aa position | Unique to NDM | Note (PD1.4) | ESP values <sup>a</sup> |
|-------------------------------------------|------------|-------------|---------------|--------------|-------------------------|
| GMVAAQHSLSLFAANGWVVEPATAPNFGPLK           | 1          |             |               | ND           |                         |
| MGGMDALHAAGIATYANALSNQLAPQK               | 1          |             |               | ND           |                         |
| QLAPNVWQHTSYLDMPSFGAVTSNGLIVR             | 1          |             |               | ND           |                         |
| SLGNLDDADTEHYAASAR                        | 1          |             |               | ND           |                         |
| TDIAFGGCLIK                               | 1          |             |               | ND           |                         |
| VFYPPGGHTSDNITVGIDR                       | 1          |             |               | ND           |                         |
| VLLVDTAWTDDQTAQLNWIK                      | 1          |             |               | ND           |                         |
| SLGNLGDADTEHYAASVR                        | 2          |             |               | ND           |                         |
| SLGNLGDADTEHYAASAR                        | 12         | 217-234     | yes           | strong peak  | 0.67                    |
| VLVVDTAWTDDQTAQLNWIK                      | 12         |             |               | ND           | 0.08                    |
| QLAPNVWQHTSYLDMPSFGAVASNGLIVR             | 14         |             |               | ND           | 0.03                    |
| VFYPPGGHTSDNITVGIDGTDIAFGGCLIK            | 14         |             |               | ND           | 0.16                    |
| AAIHTAR                                   | 15         |             |               | ND           | 0.32                    |
| AFGAAFPK                                  | 15         | 235-242     | yes           | strong peak  | 0.49                    |
| ASMIVMSHSAPDSR                            | 15         | 243-256     | yes           | strong peak  | 0.53                    |
| FGDLVFR                                   | 15         | 46-52       | none specific | weak peak    | 0.38                    |
| MELPNIMHPVAK                              | 15         |             |               | ND           | 0.42                    |
| QEINLPVALAVVTHAHQDK                       | 15         |             |               | ND           | 0.22                    |

<sup>a</sup>Enhanced signature peptide: prediction tool based on protein sequence as defined in Fusaro et al, 2009 (1)

**Supplemental Table 3:** R ratios and rdotp values for the second preparation of *bla*<sub>NDM</sub> positive L017, L092 and L099 isolates tested

| Sample, followed by replicate number | SLGNLGDADTEHYAASAR     | ASMIVMSHSAPDSR         | AFGAAPFK               | Assay result |
|--------------------------------------|------------------------|------------------------|------------------------|--------------|
| L017-1                               | 0.99/0.04 <sup>a</sup> | 0.93/0.08 <sup>b</sup> | 0.91/0.14 <sup>b</sup> | Negative     |
| L017-2                               | 0.92/0.04              | 0.94/0.06              | 0.91/0.1 <sup>b</sup>  | Negative     |
| L017-3                               | 0.9/0.04               | 0.95/0.06              | 0.96/0.07 <sup>b</sup> | Negative     |
| L048                                 | 1.0/34.83              | 0.98/93.42             | 1.0/15.03              | Positive     |
| L075                                 | 0.99/0.26              | 0.95/0.33 <sup>c</sup> | 0.99/0.11              | Positive     |
| L092-1                               | 1.0/18.39              | 0.98/31.65             | 1.0/8.49               | Positive     |
| L092-2                               | 1.0/16.69              | 0.98/30.58             | 1.0/7.26               | Positive     |
| L092-3                               | 1.0/18.69              | 0.98/35.17             | 1.0/7.5                | Positive     |
| L099-1                               | 1.0/23.84              | 0.98/48.98             | 1.0/10.65              | Positive     |
| L099-2                               | 1.0/26.35              | 0.98/50.54             | 1.0/10.96              | Positive     |
| L099-3                               | 1.0/28.53              | 0.98/52.31             | 1.0/11.85              | Positive     |

<sup>a</sup>Carryover<sup>b</sup>Interference<sup>c</sup>Values after interfering y11 transition was removed. Prior to removal, values were 0.54/1.22

**Supplemental Table 4:** Assay reproducibility on three separate colonies on the same plate

| Isolate number  | SLGNLGDADTEHYAASAR |       |       |      |      | ASMIVMSHSAPDSR |       |       |      |      | AFGAAFPCK |       |       |      |      | Ave  | %CV  |
|-----------------|--------------------|-------|-------|------|------|----------------|-------|-------|------|------|-----------|-------|-------|------|------|------|------|
|                 | Set 1              | Set 2 | Set 3 | Ave  | %CV  | Set 1          | Set 2 | Set 3 | Ave  | %CV  | Set 1     | Set 2 | Set 3 | Ave  | %CV  |      |      |
| L092            | 18.4               | 16.7  | 18.7  | 17.9 | 6.03 | 31.7           | 30.6  | 35.2  | 32.5 | 7.39 | 8.5       | 7.3   | 7.5   | 7.8  | 8.24 |      |      |
| L099            | 23.8               | 26.4  | 28.5  | 26.2 | 8.99 | 49             | 50.5  | 52.3  | 50.6 | 3.27 | 10.7      | 11    | 11.9  | 11.2 | 5.58 | Ave  | %CV  |
| Ratio L099/L092 |                    |       |       | 1.46 |      |                |       |       | 1.56 |      |           |       |       | 1.44 |      | 1.49 | 4.32 |



Supplemental Table 5a: Label-free quantification of detected plasmid proteins in two preparations of L092

| Accession                     | Description                                                                              | Coverage [%] | # Unique Peptides | Ratio first and second preparations of L092 | plasmid <sup>a</sup>          |
|-------------------------------|------------------------------------------------------------------------------------------|--------------|-------------------|---------------------------------------------|-------------------------------|
| ARA20636.1                    | cupin (plasmid) [Escherichia coli]                                                       | 35.59        | 2                 | 21.06                                       | plasmid_unitig_2              |
| ARA20543.1                    | hypothetical protein AM365_27365 (plasmid) [Escherichia coli]                            | 52.22        | 4                 | 6.00                                        | plasmid_unitig_1              |
| ARA20470.1                    | hypothetical protein AM365_26880 (plasmid) [Escherichia coli]                            | 39.00        | 7                 | 2.61                                        | plasmid_unitig_1              |
| ARA20624.1                    | WYL domain-containing protein (plasmid) [Escherichia coli]                               | 13.58        | 3                 | 2.48                                        | plasmid_unitig_2              |
| ARA20437.1                    | plasmid replication protein (plasmid) [Escherichia coli]                                 | 28.96        | 8                 | 2.43                                        | plasmid_unitig_1              |
| ARA20637.1                    | DUF86 domain-containing protein (plasmid) [Escherichia coli]                             | 39.10        | 3                 | 1.69                                        | plasmid_unitig_2              |
| ARA20570.1                    | aminoglycoside N-acetyltransferase AAC(6)-Ib3 (plasmid) [Escherichia coli]               | 39.67        | 5                 | 1.68                                        | plasmid_unitig_1 <sup>b</sup> |
| ARA20560.1                    | hypothetical protein AM365_27450 (plasmid) [Escherichia coli]                            | 51.56        | 2                 | 1.63                                        | plasmid_unitig_1              |
| ARA20674.1                    | cobyrinic acid ac-diamide synthase (plasmid) [Escherichia coli]                          | 49.04        | 7                 | 1.60                                        | plasmid_unitig_2              |
| ARA20485.1                    | sulfonamide-resistant dihydropteroate synthase Sul1 (plasmid) [Escherichia coli]         | 53.76        | 10                | 1.50                                        | plasmid_unitig_1              |
| ARA20561.1                    | hypothetical protein AM365_27455 (plasmid) [Escherichia coli]                            | 36.15        | 4                 | 1.50                                        | plasmid_unitig_1              |
| ARA20681.1                    | plasmid maintenance protein CcdB (plasmid) [Escherichia coli]                            | 23.76        | 2                 | 1.48                                        | plasmid_unitig_2              |
| ARA20452.1                    | DNA replication terminus site-binding protein (plasmid) [Escherichia coli]               | 43.64        | 10                | 1.36                                        | plasmid_unitig_1              |
| ARA20545.1                    | cobalamin biosynthesis protein CobQ (plasmid) [Escherichia coli]                         | 55.94        | 10                | 1.30                                        | plasmid_unitig_1              |
| ARA20762.1                    | toxin (plasmid) [Escherichia coli]                                                       | 64.29        | 4                 | 1.27                                        | plasmid_unitig_3              |
| ARA20442.1                    | DNA-binding protein (plasmid) [Escherichia coli]                                         | 29.50        | 5                 | 1.22                                        | plasmid_unitig_1              |
| ARA20419.1                    | DNA-binding protein HU (plasmid) [Escherichia coli]                                      | 63.33        | 4                 | 1.21                                        | plasmid_unitig_1              |
| ARA20591.1                    | hypothetical protein AM365_27555 (plasmid) [Escherichia coli]                            | 59.09        | 8                 | 1.18                                        | plasmid_unitig_2              |
| ARA20439.1                    | hypothetical protein AM365_26690 (plasmid) [Escherichia coli]                            | 41.49        | 6                 | 1.17                                        | plasmid_unitig_1              |
| ARA20722.1                    | recombinase (plasmid) [Escherichia coli]                                                 | 12.26        | 3                 | 1.14                                        | plasmid_unitig_3              |
| ARA20481.1                    | RmtC family 16S rRNA (guanine(1405)-N(7))-methyltransferase (plasmid) [Escherichia coli] | 49.47        | 12                | 1.13                                        | plasmid_unitig_1              |
| ARA20673.1                    | hypothetical protein AM365_28055 (plasmid) [Escherichia coli]                            | 25.00        | 2                 | 1.12                                        | plasmid_unitig_2              |
| ARA20467.1                    | hypothetical protein AM365_26860 (plasmid) [Escherichia coli]                            | 44.00        | 5                 | 1.12                                        | plasmid_unitig_1 <sup>b</sup> |
| ARA20659.1                    | hypothetical protein AM365_27970 (plasmid) [Escherichia coli]                            | 23.17        | 2                 | 1.11                                        | plasmid_unitig_2              |
| ARA20622.1                    | hypothetical protein AM365_27730 (plasmid) [Escherichia coli]                            | 17.31        | 3                 | 1.07                                        | plasmid_unitig_2              |
| ARA20734.1                    | transcriptional regulator (plasmid) [Escherichia coli]                                   | 45.54        | 5                 | 1.01                                        | plasmid_unitig_3              |
| ARA20623.1                    | thioesterase (plasmid) [Escherichia coli]                                                | 25.78        | 2                 | 1.01                                        | plasmid_unitig_2              |
| ARA20739.1                    | hypothetical protein AM365_28415 (plasmid) [Escherichia coli]                            | 27.39        | 5                 | 1.00                                        | plasmid_unitig_3              |
| ARA20582.1                    | hypothetical protein AM365_27500 (plasmid) [Escherichia coli]                            | 61.97        | 6                 | 0.97                                        | plasmid_unitig_2              |
| ARA20562.1                    | ATPase (plasmid) [Escherichia coli]                                                      | 35.32        | 12                | 0.96                                        | plasmid_unitig_1              |
| ARA20759.1                    | DNA polymerase III subunit theta (plasmid) [Escherichia coli]                            | 24.10        | 2                 | 0.95                                        | plasmid_unitig_3              |
| ARA20724.1                    | cobyrinic acid ac-diamide synthase (plasmid) [Escherichia coli]                          | 31.92        | 6                 | 0.90                                        | plasmid_unitig_3              |
| ARA20726.1                    | glutamine-tRNA ligase (plasmid) [Escherichia coli]                                       | 46.47        | 25                | 0.88                                        | plasmid_unitig_3              |
| ARA20778.1                    | olxA (plasmid) [Escherichia coli]                                                        | 48.61        | 3                 | 0.84                                        | plasmid_unitig_3              |
| ARA20584.1                    | transcriptional regulator (plasmid) [Escherichia coli]                                   | 57.41        | 5                 | 0.83                                        | plasmid_unitig_2              |
| ARA20544.1                    | chromosome partitioning protein ParB (plasmid) [Escherichia coli]                        | 36.13        | 8                 | 0.83                                        | plasmid_unitig_1              |
| ARA20723.1                    | plasmid stabilization protein (plasmid) [Escherichia coli]                               | 42.86        | 3                 | 0.79                                        | plasmid_unitig_3              |
| ARA20579.1                    | CopG family transcriptional regulator (plasmid) [Escherichia coli]                       | 31.97        | 4                 | 0.75                                        | plasmid_unitig_2              |
| ARA20451.1                    | KfrA protein (plasmid) [Escherichia coli]                                                | 52.02        | 15                | 0.71                                        | plasmid_unitig_1              |
| ARA20733.1                    | hypothetical protein AM365_28380 (plasmid) [Escherichia coli]                            | 59.00        | 6                 | 0.71                                        | plasmid_unitig_2              |
| ARA20516.1                    | hypothetical protein AM365_27215 (plasmid) [Escherichia coli]                            | 46.89        | 3                 | 0.65                                        | plasmid_unitig_1              |
| ARA20417.1                    | transcriptional regulator (plasmid) [Escherichia coli]                                   | 30.00        | 2                 | 0.63                                        | plasmid_unitig_1              |
| ARA20725.1                    | hypothetical protein AM365_28335 (plasmid) [Escherichia coli]                            | 38.95        | 4                 | 0.60                                        | plasmid_unitig_3              |
| ARA20574.1                    | CMY-2 family class C beta-lactamase (plasmid) [Escherichia coli]                         | 75.79        | 20                | 0.58                                        | plasmid_unitig_1 <sup>b</sup> |
| ARA20653.1                    | arsenate reductase (glutaredoxin) (plasmid) [Escherichia coli]                           | 53.90        | 3                 | 0.46                                        | plasmid_unitig_2              |
| ARA20761.1                    | prevent-host-death family protein (plasmid) [Escherichia coli]                           | 63.01        | 3                 | 0.46                                        | plasmid_unitig_3              |
| ARA20581.1                    | recombinase (plasmid) [Escherichia coli]                                                 | 39.26        | 8                 | 0.38                                        | plasmid_unitig_2              |
| ARA20454.1                    | co-chaperone GroES (plasmid) [Escherichia coli]                                          | 48.96        | 5                 | 0.00                                        | plasmid_unitig_1              |
| ARA20459.1                    | subclass B1 metallo-beta-lactamase NDM-1 (plasmid) [Escherichia coli]                    | 37.78        | 6                 | 0.00                                        | plasmid_unitig_1              |
| <sup>a</sup> plasmid_unitig_1 | 165 proteins                                                                             |              |                   |                                             |                               |
| plasmid_unitig_2              | 114 proteins                                                                             |              |                   |                                             |                               |
| plasmid_unitig_3              | 105 proteins                                                                             |              |                   |                                             |                               |

<sup>b</sup>slightly different sequences, not 100% sequence match

Supplemental Table 5b: Label-free quantification of detected plasmid proteins two preparations of L099

| Accession                        | Description                                                                              | Coverage [%] | # Unique Peptides | ratio of first and second preparations of L099 | plasmid <sup>a</sup>             |
|----------------------------------|------------------------------------------------------------------------------------------|--------------|-------------------|------------------------------------------------|----------------------------------|
| ARX53762.1                       | DNA-binding protein HU (plasmid) [Escherichia coli]                                      | 63.33        | 4                 | 12.02                                          | plasmid_tig00000792              |
| ARX53891.1                       | hypothetical protein AM375_00865 (plasmid) [Escherichia coli]                            | 51.56        | 2                 | 6.19                                           | plasmid_tig00000792              |
| ARX53925.1                       | DUF86 domain-containing protein (plasmid) [Escherichia coli]                             | 32.33        | 3                 | 5.53                                           | plasmid_tig00000793              |
| ARX54073.1                       | hypothetical protein AM375_01900 (plasmid) [Escherichia coli]                            | 59.09        | 7                 | 5.37                                           | plasmid_tig00000793              |
| ARX53874.1                       | hypothetical protein AM375_00780 (plasmid) [Escherichia coli]                            | 63.33        | 5                 | 5.11                                           | plasmid_tig00000792              |
| ARX53792.1                       | KfrA protein (plasmid) [Escherichia coli]                                                | 48.27        | 16                | 4.88                                           | plasmid_tig00000792              |
| ARX53800.1                       | hypothetical protein AM375_00295 (plasmid) [Escherichia coli]                            | 14.50        | 2                 | 4.05                                           | plasmid_tig00000792              |
| ARX53903.1                       | hypothetical protein AM375_00300 (plasmid) [Escherichia coli]                            | 35.00        | 4                 | 3.38                                           | plasmid_tig00000792              |
| ARX54083.1                       | hypothetical protein AM375_01955 (plasmid) [Escherichia coli]                            | 61.97        | 6                 | 3.35                                           | plasmid_tig00000793              |
| ARX53907.1                       | aminoglycoside N-acetyltransferase AAC(6)-Ib3 (plasmid) [Escherichia coli]               | 39.67        | 5                 | 3.35                                           | plasmid_tig00000792 <sup>b</sup> |
| ARX54111.1                       | hypothetical protein AM375_02125 (plasmid) [Escherichia coli]                            | 23.17        | 2                 | 3.02                                           | plasmid_tig00000793              |
| ARX54081.1                       | transcriptional regulator (plasmid) [Escherichia coli]                                   | 64.81        | 6                 | 2.79                                           | plasmid_tig00000793              |
| ARX53848.1                       | hypothetical protein AM375_00645 (plasmid) [Escherichia coli]                            | 51.41        | 3                 | 2.78                                           | plasmid_tig00000792              |
| ARX53779.1                       | hypothetical protein AM375_00185 (plasmid) [Escherichia coli]                            | 31.38        | 6                 | 2.73                                           | plasmid_tig00000792              |
| ARX53875.1                       | chromosome partitioning protein ParB (plasmid) [Escherichia coli]                        | 46.06        | 9                 | 2.73                                           | plasmid_tig00000792              |
| ARX53782.1                       | DNA-binding protein (plasmid) [Escherichia coli]                                         | 30.22        | 4                 | 2.72                                           | plasmid_tig00000792              |
| ARX54117.1                       | arsenate reductase (glutaredoxin) (plasmid) [Escherichia coli]                           | 34.04        | 2                 | 2.72                                           | plasmid_tig00000793              |
| ARX53793.1                       | DNA replication terminus site-binding protein (plasmid) [Escherichia coli]               | 26.80        | 6                 | 2.59                                           | plasmid_tig00000792              |
| ARX53876.1                       | cobalamin biosynthesis protein CobQ (plasmid) [Escherichia coli]                         | 55.94        | 10                | 2.37                                           | plasmid_tig00000792              |
| ARX53816.1                       | sulfonamide-resistant dihydropteroate synthase Sul1 (plasmid) [Escherichia coli]         | 48.75        | 9                 | 1.91                                           | plasmid_tig00000792              |
| ARX53812.1                       | RmtC family 16S rRNA (guanine(1405)-N(7))-methyltransferase (plasmid) [Escherichia coli] | 46.62        | 11                | 1.89                                           | plasmid_tig00000792              |
| ARX53803.1                       | hypothetical protein AM375_00320 (plasmid) [Escherichia coli]                            | 27.80        | 5                 | 1.79                                           | plasmid_tig00000792              |
| ARX53849.1                       | class C beta-lactamase CMY-6 (plasmid) [Escherichia coli]                                | 67.98        | 17                | 1.65                                           | plasmid_tig00000792              |
| ARX53760.1                       | transcriptional regulator (plasmid) [Escherichia coli]                                   | 30.00        | 2                 | 1.63                                           | plasmid_tig00000792              |
| ARX54097.1                       | cobyrinic acid ac-diamide synthase (plasmid) [Escherichia coli]                          | 21.63        | 4                 | 1.49                                           | plasmid_tig00000793              |
| ARX53892.1                       | hypothetical protein AM375_00870 (plasmid) [Escherichia coli]                            | 50.00        | 6                 | 1.37                                           | plasmid_tig00000792              |
| ARX54086.1                       | CopG family transcriptional regulator (plasmid) [Escherichia coli]                       | 13.61        | 2                 | 1.27                                           | plasmid_tig00000793              |
| ARX53893.1                       | ATPase (plasmid) [Escherichia coli]                                                      | 25.26        | 9                 | 1.18                                           | plasmid_tig00000792              |
| ARX54084.1                       | recombinase (plasmid) [Escherichia coli]                                                 | 36.81        | 7                 | 1.14                                           | plasmid_tig00000793              |
| ARX54041.1                       | hypothetical protein AM375_01725 (plasmid) [Escherichia coli]                            | 25.64        | 4                 | 0.93                                           | plasmid_tig00000793              |
| ARX53988.1                       | glutamine-tRNA ligase (plasmid) [Escherichia coli]                                       | 36.89        | 2                 | 0.58                                           | plasmid_tig00000793              |
| ARX54135.1                       | adenine specific DNA methylase (plasmid) [Escherichia coli]                              | 9.53         | 5                 | 0.42                                           | plasmid_tig00000856              |
| ARX54026.1                       | toxin (plasmid) [Escherichia coli]                                                       | 39.68        | 3                 | 0.20                                           | plasmid_tig00000793              |
| ARX53985.1                       | plasmid stabilization protein (plasmid) [Escherichia coli]                               | 42.86        | 3                 | 0.00                                           | plasmid_tig00000793              |
| ARX53940.1                       | subclass B1 metallo-beta-lactamase NDM-1 (plasmid) [Escherichia coli]                    | 37.78        | 6                 | 0.00                                           | plasmid_tig00000793              |
| ARX53997.1                       | transcriptional regulator (plasmid) [Escherichia coli]                                   | 28.57        | 2                 | 0.00                                           | plasmid_tig00000793              |
| ARX53935.1                       | co-chaperone GroES (plasmid) [Escherichia coli]                                          | 39.58        | 4                 | 0.00                                           | plasmid_tig00000793              |
| ARX54025.1                       | prevent-host-death family protein (plasmid) [Escherichia coli]                           | 53.42        | 2                 | 0.00                                           | plasmid_tig00000793              |
| <sup>a</sup> plasmid_tig00000792 | 156 proteins                                                                             |              |                   |                                                |                                  |
| plasmid_tig00000793              | 222 proteins                                                                             |              |                   |                                                |                                  |
| plasmid_tig00000856              | 7 proteins                                                                               |              |                   |                                                |                                  |

<sup>b</sup>slightly different sequence or not 100% match

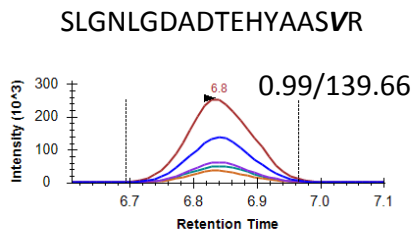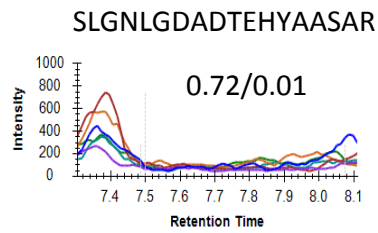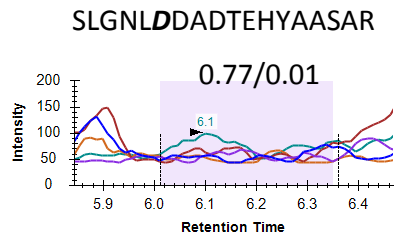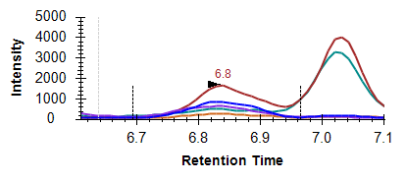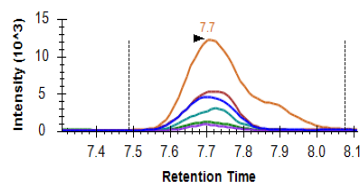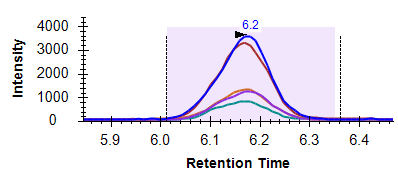

**Supplemental Figure 1:** Allelic variant of SLGNLGDADTEHYAASVR was detected in validation isolate L063 with strong signal (R-ratio value was 139.66) indicating that L063 was either NDM-6 or NDM-15

SLGNLGDADTEHYAASAR

ASMIVMSHSAPDSR

AFGAAFPk

Rdotp/R: 0.95/0.2

Rdotp/R: 1.0/0.11

Rdotp/R: 1.0/0.08

Rdotp/R: 0.95/0.15

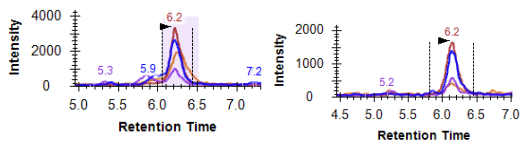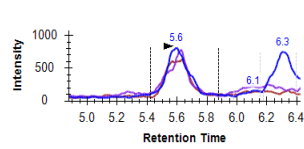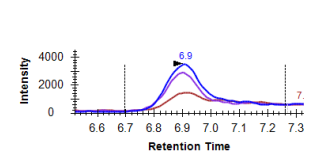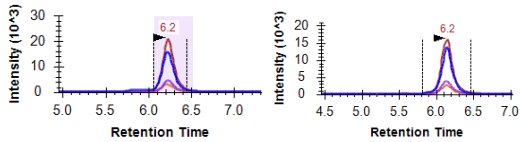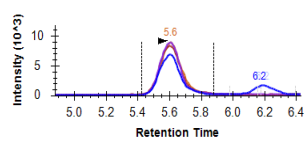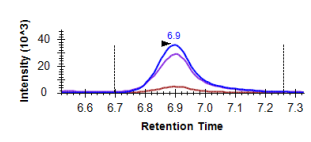

F46

F47

F57

F63

**Supplemental Figure 2:** LC-MS chromatograms of three NDM peptides for isolate L017 after high pH fractionation with 10µg total protein. All three peptides were detected at the predicted fractions per the retention times of the labeled peptides. F46, F47, F57 and F63 in the figures are fraction number. Rdotp and R-ratio values for each peptide are shown in the figures.

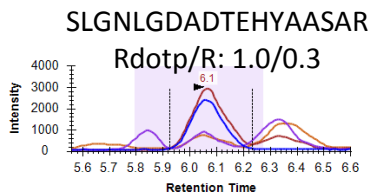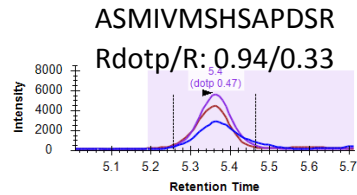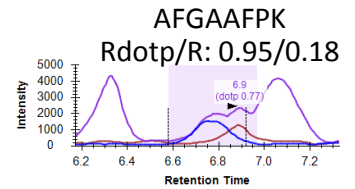

L075

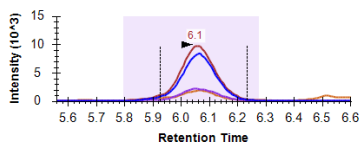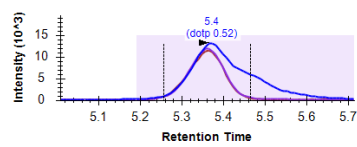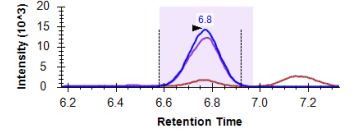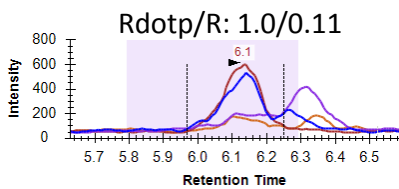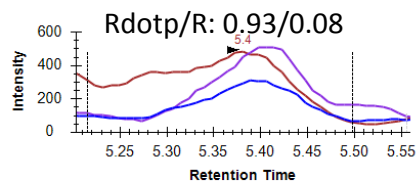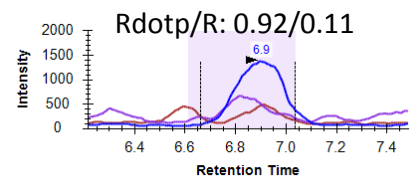

L100

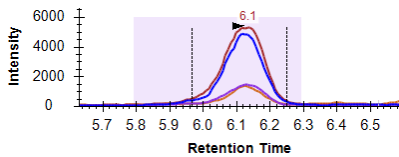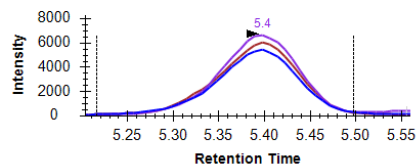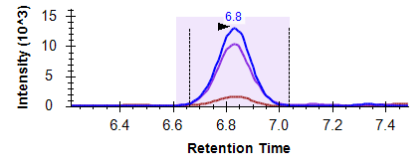

**Supplemental Figure 3:** LC-MS chromatograms of three NDM peptides for isolates L075 and L100 which were manually identified as NDM positives. One strong interfering transition in ASMIVMSHSAPDSR had been removed. Rdotp and R-ratio values for each peptide are shown in the figures.

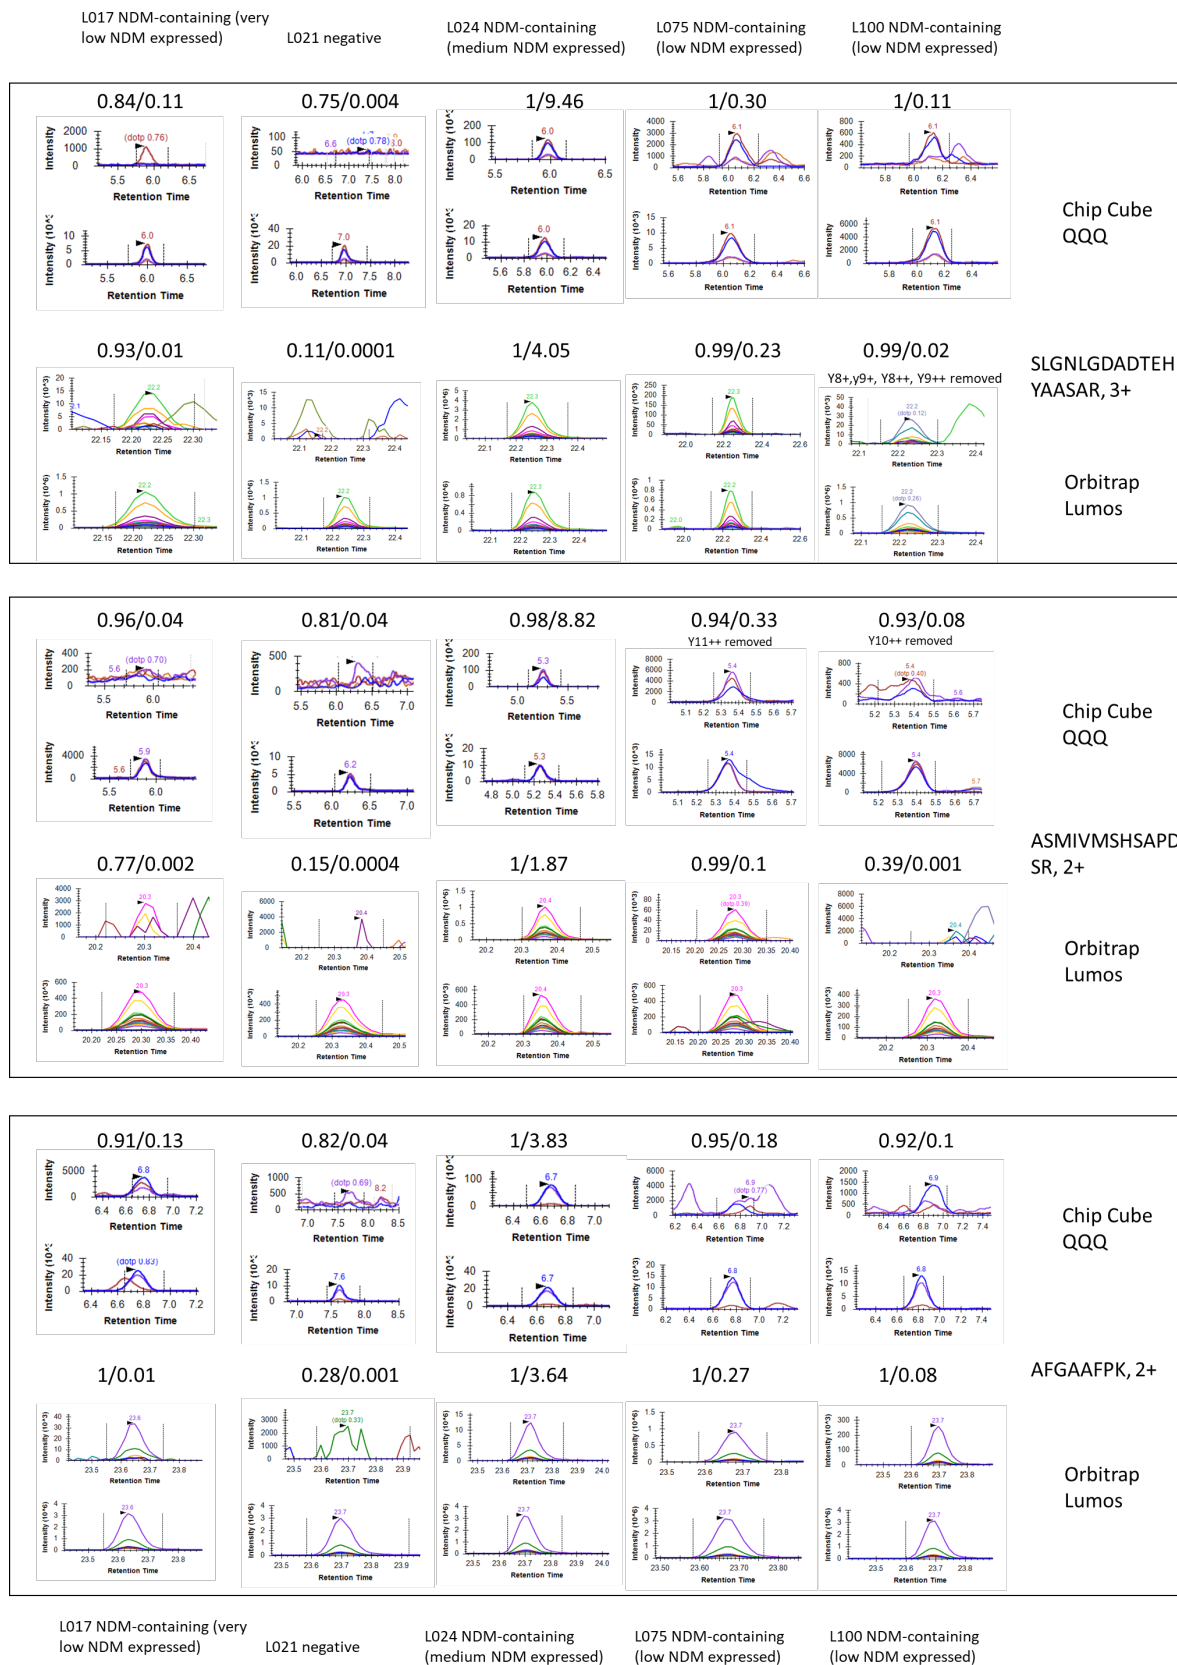

### Supplemental Figure 4:

Comparison of the chromatograms acquired by the Agilent 6495 Chip Cube QQQ and Thermo Orbitrap Lumos on five isolate lysate samples. The numbers shown on the top of the chromatograms are rdotp/R-ratios. L021 was used a negative control and L024 as a positive control. L075 and L100 are two isolates that had low NDM-expression and were identified as NDM positives by manual inspection using the Agilent 6495 Chip Cube QQQ MRM assay. L017 had very low NDM expression and was not detected by the Agilent 6495 Chip Cube QQQ MRM assay. The higher mass solution and longer gradient in the Orbitrap Lumos reduced the interference, especially for the AFGAAPK peptide and improved the detection of peptide markers for the isolates with low NDM abundance. For L017 and L100, SLGNLGDADTEHYAASAR and AFGAAPK were detected by the Orbitrap Lumos while ASMIVMSHSAPDSR was not detected. Thus, these isolates could be identified as NDM-positive by the Orbitrap method. Interferences were observed for SLGNLGDADTEHYAASAR in sample L100. However, MS/MS spectra acquired by Orbitrap Lumos contains the full set of transitions, which allows for the removal of transitions due to interference. After removing the y8+, y8++, y9+ and y9++ transitions, the Orbitrap Lumos correctly identified this peptide.
